# Supplementary material for: Active and Repressive Chromatin-Associated Proteome after MPA Treatment and the Role of Midkine in Epithelial Monolayer Permeability
Source: MDPI journal article supplement (doi:10.3390/ijms17040597), 2016-04-20
Supplement: s1 [file s1]

# Supplementary Materials: Active and Repressive Chromatin Associated Proteome after MPA Treatment and the Role of Midkine in Epithelial Monolayer Permeability

Niamat Khan, Christof Lenz, Lutz Binder, Dasaradha Venkata Krishna Pantakani and Abdul R. Asif

**Table S1.** List of significantly altered proteins associated with active (H3K4me3) and or repressive (H3K27me3) histone modification marks in MPA treated Caco-2 cells.

| ChIP                                             | Accession No. | Protein Name                                         | Fold Change | p-Value | Functions (Uniprot)                                                         |
|--------------------------------------------------|---------------|------------------------------------------------------|-------------|---------|-----------------------------------------------------------------------------|
| Histone Modification<br>Active Mark<br>(H3K4me3) | Q9UN86        | Ras GTPase-activating protein-binding protein 2 OS   | 2.5 ↓       | 0.0067  | mRNA transportation                                                         |
|                                                  | P63104        | 14-3-3 protein zeta/delta                            | 1.1 ↑       | 0.0031  | Adaptor protein                                                             |
|                                                  | P61978        | Heterogeneous nuclear ribonucleoprotein K            | 1.4 ↑       | 0.0032  | Transcription activation/repression, hnRNAs metabolism                      |
|                                                  | P07355        | Annexin A2                                           | 1.2 ↑       | 0.0011  | Heat response                                                               |
|                                                  | P68104        | Elongation factor 1-alpha 1                          | 1.1 ↑       | 0.0011  | Transcription activity, protein synthesis                                   |
|                                                  | Q8IU66        | Histone H2A type 2-B                                 | 1.2 ↑       | 0.0087  | Chromatin structure                                                         |
|                                                  | P62258        | 14-3-3 protein epsilon                               | 1 ↑         | 0.005   | Adaptor protein                                                             |
|                                                  | P61254        | 60S ribosomal protein L26                            | 1 ↑         | 0.0078  |                                                                             |
|                                                  | Q01844        | RNA-binding protein EWS                              | 1.1 ↑       | 0.003   | Repressor                                                                   |
|                                                  | P68431        | Histone H3.1                                         | 1.4 ↑       | 0.0011  | Chromatin structure                                                         |
|                                                  | P16402        | Histone H1.3                                         | 1.1 ↑       | 0.00019 | Chromatin structure, regulator of individual gene transcription             |
|                                                  | P62249        | 40S ribosomal protein S16                            | 1.25 ↓      | 0.0042  |                                                                             |
|                                                  | Q15691        | Microtubule-associated protein RP/EB family member 1 | 1.1 ↓       | 0.0046  | Microtubule base cytoskeleton                                               |
|                                                  | Q13242        | Serine/arginine-rich splicing factor 9               | 1.1 ↑       | 0.00038 | Splicing activity                                                           |
|                                                  | P37108        | Signal recognition particle 14 kDa protein           | 1.0 ↑       | 0.0039  |                                                                             |
|                                                  | Q96AE4        | Far upstream element-binding protein 1               | 1.4 ↑       | 0.0063  | Transcriptional activity                                                    |
|                                                  | P24534        | Elongation factor 1-beta                             | 1.3 ↑       | 0.0015  | Exchanging EF-1alpha bound GDP to GTP                                       |
|                                                  | Q12906        | Interleukin enhancer-binding factor 3                | 1.5 ↑       | 0.00042 | Gene regulation, protein synthesis                                          |
|                                                  | P10599        | Thioredoxin                                          | 1.1 ↑       | 0.00048 | Transcription activity, redox reaction                                      |
|                                                  | P62081        | 40S ribosomal protein S7                             | 1.3 ↑       | 0.0071  | rRNA maturation                                                             |
|                                                  | P62851        | 40S ribosomal protein S25                            | 0.9 ↓       | 0.0006  |                                                                             |
|                                                  | Q12874        | Splicing factor 3A subunit 3                         | 1.3 ↑       | 0.0058  | Subunit of A & E complex                                                    |
|                                                  | P62857        | 40S ribosomal protein S28                            | 1.1 ↓       | 0.0043  |                                                                             |
|                                                  | P09234        | U1 small nuclear ribonucleoprotein C                 | 1.1 ↑       | 0.0054  | Splicing activity                                                           |
|                                                  | Q14157        | Ubiquitin-associated protein 2-like                  | 1.3 ↑       | 0.00014 | Ubiquitin-proteasome pathway, growth and migration of prostate cancer cells |
|                                                  | P25398        | 40S ribosomal protein S12                            | 1.25 ↓      | 0.0082  |                                                                             |
|                                                  | Q99459        | Cell division cycle 5-like protein                   | 1.6 ↑       | 0.0032  | Cell cycle regulator, transcription activity                                |
|                                                  | O95793        | Double-stranded RNA-binding protein Stauf homolog 1  | 1.5 ↑       | 0.0028  | Cross linking cytoskeleton, RNA component, translation                      |
|                                                  | P62424        | 60S ribosomal protein L7a                            | 1.3 ↑       | 0.0074  |                                                                             |
|                                                  | Q92522        | Histone H1x                                          | 1.7 ↑       | 0.008   | Chromatin condensation                                                      |
|                                                  | Q71UI9        | Histone H2A.V                                        | 1.2 ↑       | 0.0017  | Chromosome segregation, cell division                                       |
|                                                  | Q9NYL4        | Peptidyl-prolyl <i>cis-trans</i> isomerase FKBP11    | 1.11 ↓      | 0.0065  | Protein folding                                                             |
|                                                  | P12277        | Creatine kinase B-type                               | 1.4 ↑       | 0.0096  | Energy transduction                                                         |
|                                                  | P14866        | Heterogeneous nuclear ribonucleoprotein L            | 1.8 ↑       | 0.0022  | Splicing activity, regulator of exon inclusion                              |
|                                                  | P02545        | Prelamin-A/C                                         | 1.7 ↑       | 0.0022  | Nuclear lamina, chromatin organization, telomere dynamics                   |
|                                                  | P20700        | Lamin-B1                                             | 1.8 ↑       | 0.002   | Nuclear lamina, chromatin organization, telomere dynamics                   |
|                                                  | P23528        | Cofilin-1                                            | 1.4 ↑       | 0.0016  | Cell morphology, cytoskeletal organization                                  |
|                                                  | Q13813        | Spectrin alpha chain, non-erythrocytic 1             | 5.5 ↑       | 0.0038  | Cytoskeleton                                                                |
|                                                  | P21796        | Voltage-dependent anion-selective channel protein 1  | 1.9 ↑       | 0.0046  | Cell volume, apoptosis                                                      |

Table S1. Cont.

| ChIP                                                   | Accession No. | Protein Name                                                | Fold Change  | p-Value        | Functions (Uniprot)                                                            |
|--------------------------------------------------------|---------------|-------------------------------------------------------------|--------------|----------------|--------------------------------------------------------------------------------|
|                                                        | Q15365        | Poly(rC)-binding protein 1                                  | 1.8 ↑        | 0.0029         | Nucleic acid binding protein                                                   |
|                                                        | P53999        | Activated RNA polymerase II transcriptional coactivator p15 | 2.1 ↑        | 0.006          | Stabilizing the multiproteins transcription complex                            |
|                                                        | P09327        | Villin-1                                                    | 2.5 ↑        | 0.005          | Cell morphology, division, migration and apoptosis                             |
|                                                        | <b>P21741</b> | <b>Midkine</b>                                              | <b>3.8 ↑</b> | <b>0.00010</b> | <b>Growth factor, activator of PI3K, MAPK pathways</b>                         |
|                                                        | Q15366        | Poly(rC)-binding protein 2                                  | 2.2 ↑        | 0.0093         | Nucleic acid binding protein, adaptor & regulator protein                      |
|                                                        | P61586        | Transforming protein RhoA                                   | 3 ↑          | 0.0071         | Signal transduction pathway, activator, cell migration                         |
|                                                        |               |                                                             |              |                |                                                                                |
| <b>Histone Modification Repressive Mark (H3K27me3)</b> | Q06830        | Peroxiredoxin-1                                             | 1.67 ↓       | 0.00094        | Redox regulation                                                               |
|                                                        | P13639        | Elongation factor 2                                         | 1.67 ↓       | 0.00010        | ribosomal translocation                                                        |
|                                                        | P12956        | X-ray repair cross-complementing protein 6                  | 5 ↓          | 0.00098        | Helicase activity, chromosome translocation, negative transcription regulators |
|                                                        | Q9ULV4        | Coronin-1C                                                  | 3.33 ↓       | 0.00044        | Cytokinesis, motility, and signal transduction                                 |
|                                                        | P14174        | Macrophage migration inhibitory factor                      | 1.25 ↓       | 0.00058        | Pro inflammatory cytokines                                                     |
|                                                        | P10599        | Thioredoxin                                                 | 1.1 ↑        | 0.00010        | Redox reactions, DNA binding activity                                          |
|                                                        | Q9NX24        | H/ACA ribonucleoprotein complex subunit 2                   | 4.3 ↑        | 0.00010        | Ribosome biogenesis, telomere maintenance                                      |

Arrows indicate “↑” upregulation and “↓” downregulation of the respective proteins after MPA treatment as compared with DMSO (control in fold change). Protein highlighted in the **bold** (Midkine) was further characterized by exploring its role in the increased permeability of Tight Junctions in Caco-2 cells monolayer after MPA treatment.
